# Supplementary material
Source: HighWire-hosted journal article supplement (http://jpet.aspetjournals.org/highwire/filestream/136410/field_highwire_adjunct_files/2/JPET208595_SUPPLEMENTAL_DATA_3.pdf)

**Combined Analysis of Pharmacokinetic and Efficacy Data of Preclinical Studies with Statins Markedly Improves Translation of Drug Efficacy to Human Trials**

*E. van de Steeg, R. Kleemann, H.T. Jansen, W. van Duyvenvoorde, E.H. Offerman, H.M. Wortelboer and J. DeGroot*

**SUPPLEMENTAL DATA 3**

Plasma TC levels in E3L mice fed with a HFC diet and after 6-weeks of treatment with different statins at increasing dose.

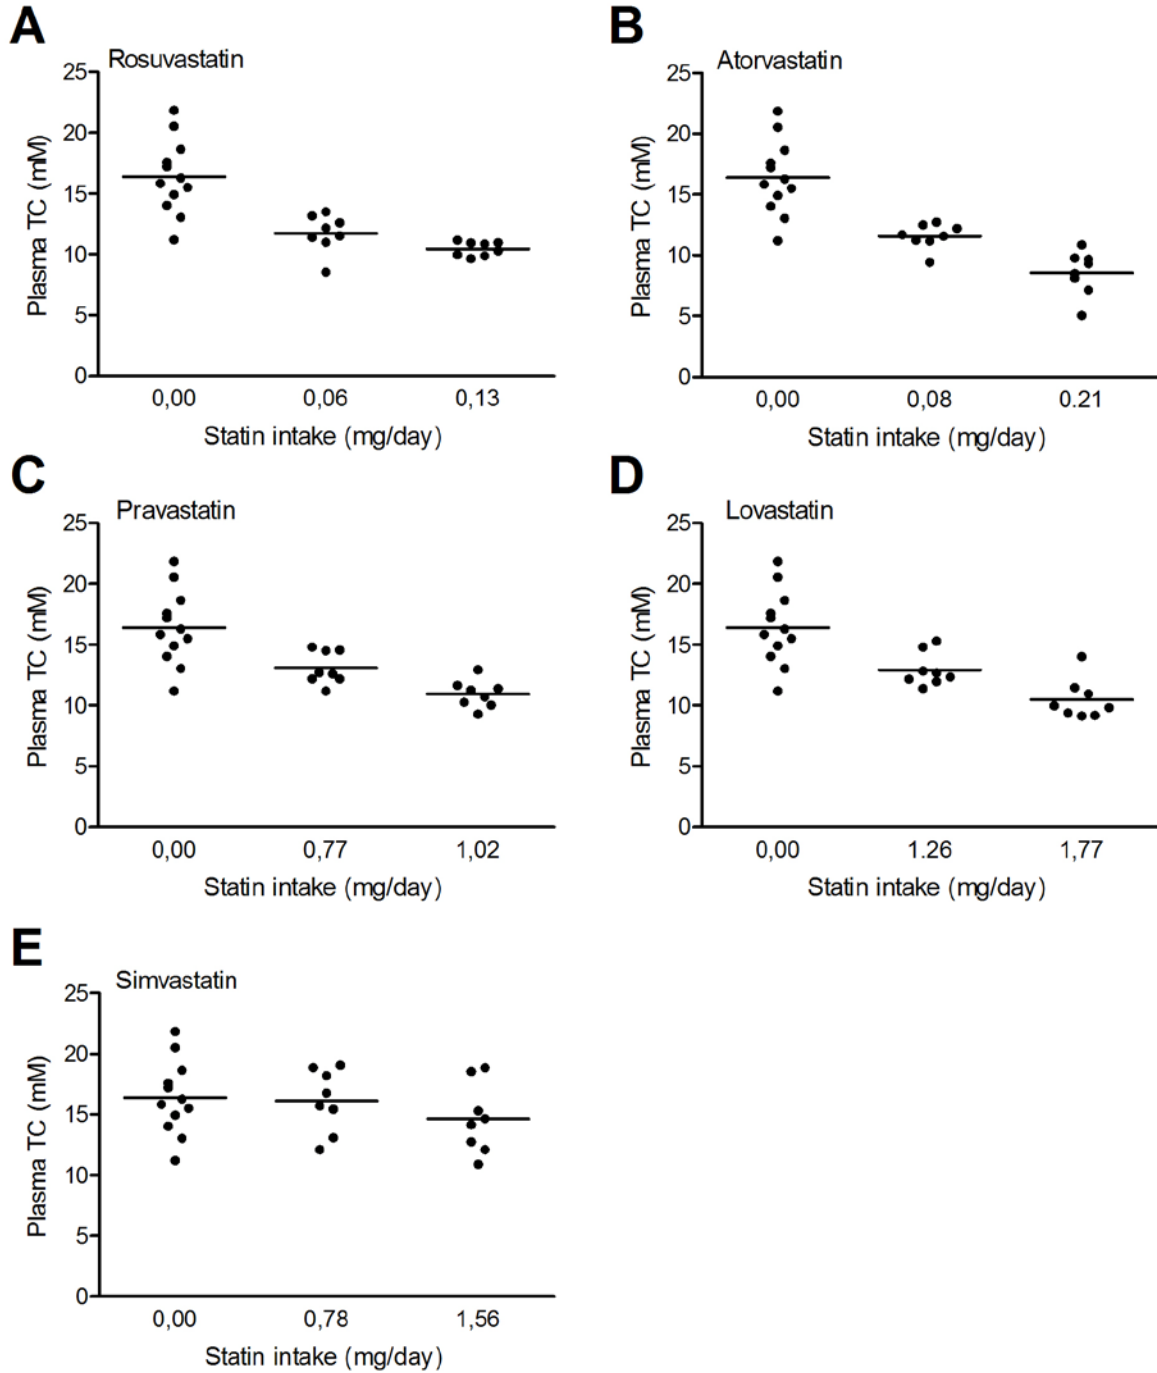

Supplement: JPET208595_SUPPLEMENTAL_DATA_3.pdf [file JPET208595_SUPPLEMENTAL_DATA_3.pdf]
